# Supplementary material
Source: PubMed Central journal article supplement (PMC4928582)
Supplement: NIHMS785654-supplement-ESI.pdf [file NIHMS785654-supplement-ESI.pdf]

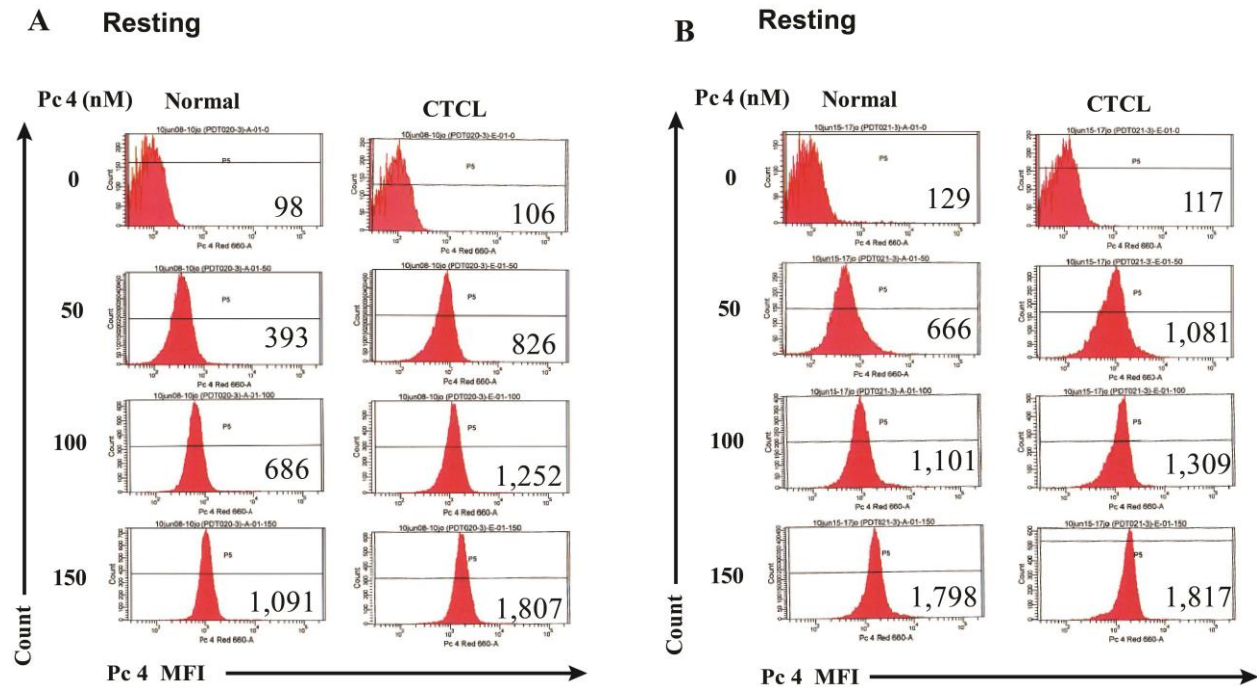

### S1 Cutaneous T Cell Lymphoma T cell uptake of Pc 4

To determine if a “naturally activated” T cell population also incorporated more Pc 4, we isolated T cells from either CTCL patients or healthy subjects and incubated them with 0, 50, 100 and 150 nM Pc 4 (A). Activated or resting T cells were then assessed for monomeric Pc 4 incorporation by flow cytometry and the median uptake values of Pc 4 MFI for CTCL patients versus healthy control volunteers was calculated (B).
